# Supplementary material for: Rapidity of Improvement in Signs/Symptoms of Moderate-to-Severe Atopic Dermatitis by Body Region with Abrocitinib in the Phase 3 JADE COMPARE Study
Source: PubMed Central journal article supplement — Dermatol Ther (Heidelb). 2022 Mar 17;12(3):771–85. doi: 10.1007/s13555-022-00694-1 (PMC8940992; doi:10.1007/s13555-022-00694-1), 2022-03-17
Supplement: 13555_2022_694_MOESM1_ESM.pdf [file 13555_2022_694_MOESM1_ESM.pdf]

## **SUPPLEMENTARY MATERIAL**

### **Rapidity of Improvement in Signs/Symptoms of Moderate-to-Severe Atopic Dermatitis by Body Region with Abrocitinib in the Phase 3 JADE COMPARE Study**

Andrew Alexis,<sup>1</sup> Marjolein de Bruin-Weller,<sup>2</sup> Stephan Weidinger,<sup>3</sup> Weily Soong,<sup>4</sup> Sebastien Barbarot,<sup>5</sup> Ileana Ionita,<sup>6</sup> Fan Zhang,<sup>6</sup> Hernan Valdez,<sup>7</sup> Claire Clibborn,<sup>8</sup> Natalie Yin<sup>7</sup>

<sup>1</sup>Weill Cornell Medical College, New York, NY, USA; <sup>2</sup>University Medical Center Utrecht, Utrecht, Netherlands; <sup>3</sup>University Hospital Schleswig-Holstein, Kiel, Germany; <sup>4</sup>Alabama Allergy & Asthma Center, Clinical Research Center of Alabama, Birmingham, AL, USA; <sup>5</sup>CHU de Nantes Hôtel Dieu, Nantes, France; <sup>6</sup>Pfizer Inc., Groton, CT, USA; <sup>7</sup>Pfizer Inc., New York, NY, USA; <sup>8</sup>Pfizer Ltd., Surrey, United Kingdom

#### **Corresponding author:**

Claire Clibborn

Pfizer Ltd, Walton Oaks, Dorking Road

Tadworth KT20 7NS, Surrey, UK

Email: [Claire.Clibborn@pfizer.com](mailto:Claire.Clibborn@pfizer.com)

Phone Number: +44 7554 110429

**Table S1** Mean (SD) baseline SCORAD extent, intensity, pruritus, and sleep loss scores

|                                                      | <b>Placebo<br/>(N = 131)</b> | <b>Abrocitinib<br/>100 mg QD<br/>(N = 238)</b> | <b>Abrocitinib<br/>200 mg QD<br/>(N = 226)</b> | <b>Dupilumab<br/>300 mg Q2W<br/>(N = 242)</b> |
|------------------------------------------------------|------------------------------|------------------------------------------------|------------------------------------------------|-----------------------------------------------|
| <b>SCORAD extent</b>                                 |                              |                                                |                                                |                                               |
| Head and neck (max 9)                                | 5.1 (2.51)                   | 4.8 (2.69)                                     | 4.7 (2.52)                                     | 4.6 (2.47)                                    |
| Left upper limbs (max 9)                             | 5.3 (2.49)                   | 5.2 (2.48)                                     | 5.3 (2.32)                                     | 5.1 (2.27)                                    |
| Right upper limbs (max 9)                            | 5.4 (2.40)                   | 5.2 (2.41)                                     | 5.4 (2.35)                                     | 5.1 (2.29)                                    |
| Left lower limbs (max 18)                            | 8.3 (5.52)                   | 8.5 (5.42)                                     | 8.8 (5.21)                                     | 8.1 (4.75)                                    |
| Right lower limbs (max 18)                           | 8.3 (5.51)                   | 8.5 (5.39)                                     | 8.8 (5.18)                                     | 8.0 (4.81)                                    |
| Anterior trunk (max 18)                              | 8.4 (5.40)                   | 8.1 (5.20)                                     | 8.5 (5.32)                                     | 7.8 (5.42)                                    |
| Back (max 18)                                        | 8.5 (5.64)                   | 8.4 (5.39)                                     | 8.5 (5.71)                                     | 7.9 (5.43)                                    |
| Genitals (max 1)                                     | 0.1 (0.31)                   | 0.1 (0.28)                                     | 0.1 (0.27)                                     | 0.1 (0.23)                                    |
| <b>SCORAD intensity<sup>a</sup> (max 3 for each)</b> |                              |                                                |                                                |                                               |
| Erythema                                             | 2.5 (0.55)                   | 2.4 (0.56)                                     | 2.5 (0.54)                                     | 2.5 (0.53)                                    |
| Edema/papulation                                     | 2.2 (0.60)                   | 2.2 (0.65)                                     | 2.2 (0.62)                                     | 2.3 (0.58)                                    |
| Oozing/crusting                                      | 1.4 (0.97)                   | 1.4 (0.96)                                     | 1.5 (0.93)                                     | 1.5 (0.82)                                    |
| Excoriation                                          | 2.2 (0.72)                   | 2.2 (0.70)                                     | 2.1 (0.71)                                     | 2.2 (0.67)                                    |
| Lichenification                                      | 2.3 (0.59)                   | 2.2 (0.71)                                     | 2.3 (0.62)                                     | 2.3 (0.61)                                    |
| Dryness                                              | 2.3 (0.65)                   | 2.1 (0.78)                                     | 2.2 (0.81)                                     | 2.2 (0.70)                                    |
| <b>SCORAD pruritus<sup>b</sup> (max 10)</b>          | 7.4 (1.57)                   | 7.2 (1.65)                                     | 7.5 (1.58)                                     | 7.3 (1.58)                                    |
| <b>SCORAD sleep loss<sup>c</sup> (max 10)</b>        | 5.8 (2.67)                   | 6.1 (2.42)                                     | 6.6 (2.26)                                     | 6.0 (2.62)                                    |

max maximum, Q2W every 2 weeks, QD once daily, SCORAD SCORing Atopic Dermatitis,

SD standard deviation

<sup>a</sup> Each item is scored from 0 (none) to 3 (severe)

<sup>b</sup> Visual Analogue Scale scored from no itch (0) to worst imaginable itch (10)

<sup>c</sup> Visual Analogue Scale scored from no sleep loss (0) to worst sleep loss (10)

**Table S2** Racial/ethnic categories

|                                           |
|-------------------------------------------|
| Black or African American                 |
| American Indian or Alaska Native          |
| Asian                                     |
| Native Hawaiian or Other Pacific Islander |
| White                                     |
| Not Reported                              |

**Table S3** Mean (SD) baseline EASI body region scores by White or Asian race

|              |               | <b>Placebo<br/>(N = 118)</b> | <b>Abrocitinib<br/>100 mg QD<br/>(N = 230)</b> | <b>Abrocitinib<br/>200 mg QD<br/>(N = 214)</b> | <b>Dupilumab<br/>300 mg Q2W<br/>(N = 222)</b> |
|--------------|---------------|------------------------------|------------------------------------------------|------------------------------------------------|-----------------------------------------------|
| <b>White</b> | Head and neck | 2.8 (1.6)                    | 2.8 (1.7)                                      | 2.9 (1.7)                                      | 2.8 (1.6)                                     |
|              | Upper limb    | 7.0 (3.0)                    | 7.0 (3.2)                                      | 7.5 (3.2)                                      | 7.0 (2.8)                                     |
|              | Trunk         | 8.1 (4.5)                    | 7.9 (4.3)                                      | 8.5 (4.8)                                      | 8.0 (4.5)                                     |
|              | Lower limb    | 11.2 (7.0)                   | 12.1 (7.1)                                     | 12.8 (6.8)                                     | 11.9 (5.8)                                    |
| <b>Asian</b> | Head and neck | 3.6 (1.7)                    | 2.8 (1.7)                                      | 3.3 (1.6)                                      | 3.4 (1.5)                                     |
|              | Upper limb    | 6.8 (3.2)                    | 6.0 (3.3)                                      | 6.9 (3.3)                                      | 5.9 (3.0)                                     |
|              | Trunk         | 10.3 (4.5)                   | 10.1 (4.9)                                     | 11.1 (4.4)                                     | 10.2 (5.5)                                    |
|              | Lower limb    | 12.3 (5.9)                   | 12.7 (7.8)                                     | 12.9 (6.3)                                     | 11.2 (6.1)                                    |

*EASI* Eczema Area and Severity Index, *Q2W* every 2 weeks, *QD* once daily, *SD* standard deviation

**Table S4** Kaplan-Meier median time to EASI-75 by body region among White and Asian individuals

|                                                |                      | Placebo       | Abrocitinib<br>100 mg QD     | Abrocitinib<br>200 mg QD     | Dupilumab<br>300 mg Q2W |
|------------------------------------------------|----------------------|---------------|------------------------------|------------------------------|-------------------------|
| <b>Median time to EASI-75 in days (95% CI)</b> |                      |               |                              |                              |                         |
| <b>White</b>                                   | <b>Head and neck</b> | <b>N = 52</b> | <b>N = 130</b>               | <b>N = 129</b>               | <b>N = 125</b>          |
|                                                |                      | 85 (58, 113)  | 57 (30, 60)                  | 31 (29, 56)                  | 57 (35, 60)             |
|                                                |                      |               | <i>p</i> = 0.0499 vs placebo | <i>p</i> < 0.0001 vs placebo |                         |
|                                                | <b>Trunk</b>         | <b>N = 51</b> | <b>N = 140</b>               | <b>N = 134</b>               | <b>N = 145</b>          |
|                                                |                      | 85 (57, 114)  | 32 (29, 57)                  | 29 (29, 30)                  | 32 (29, 57)             |
|                                                |                      |               | <i>p</i> = 0.0012 vs placebo | <i>p</i> < 0.0001 vs placebo |                         |
|                                                | <b>Upper limbs</b>   | <b>N = 37</b> | <b>N = 126</b>               | <b>N = 128</b>               | <b>N = 128</b>          |
|                                                |                      | NE (85, NE)   | 57 (30, 58)                  | 29 (29, 32)                  | 57 (55, 60)             |
|                                                |                      |               | <i>p</i> < 0.0001 vs placebo | <i>p</i> < 0.0001 vs placebo |                         |
|                                                | <b>Lower limbs</b>   | <b>N = 46</b> | <b>N = 143</b>               | <b>N = 132</b>               | <b>N = 141</b>          |
|                                                |                      | 87 (57, NE)   | 31 (30, 57)                  | 30 (29, 35)                  | 57 (34, 59)             |
|                                                |                      |               | <i>p</i> = 0.0002 vs placebo | <i>p</i> < 0.0001 vs placebo |                         |
| <b>Asian</b>                                   | <b>Head and neck</b> | <b>N = 14</b> | <b>N = 35</b>                | <b>N = 42</b>                | <b>N = 33</b>           |
|                                                |                      | 115 (114, NE) | 56 (29, 59)                  | 29 (15, 29)                  | 61 (55, 86)             |
|                                                |                      |               | <i>p</i> = 0.0038 vs placebo | <i>p</i> < 0.0001 vs placebo |                         |
|                                                | <b>Trunk</b>         | <b>N = 13</b> | <b>N = 37</b>                | <b>N = 47</b>                | <b>N = 37</b>           |
|                                                |                      | 116 (113, NE) | 34 (28, 57)                  | 29 (16, 30)                  | 56 (29, 60)             |
|                                                |                      |               | <i>p</i> = 0.0002            | <i>p</i> < 0.0001            |                         |

|                    |               |                            |                            |               |  |
|--------------------|---------------|----------------------------|----------------------------|---------------|--|
|                    |               |                            | vs placebo                 | vs placebo    |  |
| <b>Upper limbs</b> | <b>N = 11</b> | <b>N = 33</b>              | <b>N = 48</b>              | <b>N = 36</b> |  |
|                    | 116 (114, NE) | 30 (29, 57)                | 29 (27, 30)                | 57 (29, 60)   |  |
|                    |               | $p = 0.0005$<br>vs placebo | $p < 0.0001$ vs<br>placebo |               |  |
| <b>Lower limbs</b> | <b>N = 13</b> | <b>N = 39</b>              | <b>N = 49</b>              | <b>N = 35</b> |  |
|                    | 116 (113, NE) | 29 (15, 32)                | 29 (16, 30)                | 57 (31, 85)   |  |
|                    |               | vs placebo                 | vs placebo                 |               |  |
|                    |               | $p < 0.0001$               | $p < 0.0001$               |               |  |

CI Confidence interval, EASI Eczema Area and Severity Index, EASI-75  $\geq 75\%$  improvement in EASI from baseline, NE not evaluable as too few events were observed, Q2W every 2 weeks, QD once daily

Comparisons were not multiplicity controlled

N represents the number of EASI-75 responders in each analysis

**Table S5.** Kaplan-Meier median time to EASI-90 by body region among White and Asian individuals

|                                                |                      | Placebo        | Abrocitinib<br>100 mg QD | Abrocitinib<br>200 mg QD | Dupilumab<br>300 mg Q2W |
|------------------------------------------------|----------------------|----------------|--------------------------|--------------------------|-------------------------|
| <b>Median time to EASI-90 in days (95% CI)</b> |                      |                |                          |                          |                         |
| <b>White</b>                                   | <b>Head and neck</b> | <b>N = 39</b>  | <b>N = 102</b>           | <b>N = 103</b>           | <b>N = 97</b>           |
|                                                |                      | 114 (89, NE)   | 87 (84, 114)             | 57 (57, 84)              | 92 (83, 114)            |
|                                                |                      |                | $p = 0.1113$             | $p = 0.0018$             |                         |
|                                                | <b>Trunk</b>         | <b>N = 38</b>  | <b>N = 113</b>           | <b>N = 117</b>           | <b>N = 112</b>          |
|                                                |                      | 114 (85, NE)   | 85 (60, 113)             | 57 (32, 58)              | 85 (57, 92)             |
|                                                |                      |                | $p = 0.0166$             | $p < 0.0001$             |                         |
|                                                | <b>Upper limbs</b>   | <b>N = 21</b>  | <b>N = 87</b>            | <b>N = 108</b>           | <b>N = 81</b>           |
|                                                |                      | 117 (117, 119) | 114 (85, NE)             | 58 (57, 84)              | 114 (112, NE)           |
|                                                |                      |                | $p = 0.0004$             | $p < 0.0001$             |                         |
|                                                | <b>Lower limbs</b>   | <b>N = 25</b>  | <b>N = 109</b>           | <b>N = 107</b>           | <b>N = 90</b>           |
|                                                |                      | NE (115, NE)   | 84 (58, 113)             | 58 (57, 83)              | 113 (87, 115)           |
|                                                |                      |                | $p < 0.0001$             | $p < 0.0001$             |                         |
| <b>Asian</b>                                   | <b>Head and neck</b> | <b>N = 7</b>   | <b>N = 20</b>            | <b>N = 28</b>            | <b>N = 22</b>           |
|                                                |                      | NE (114, NE)   | NE (85, NE)              | 88 (31, NE)              | 115 (85, NE)            |
|                                                |                      |                | $p = 0.0502$             | $p = 0.0036$             |                         |
|                                                | <b>Trunk</b>         | <b>N = 5</b>   | <b>N = 28</b>            | <b>N = 37</b>            | <b>N = 25</b>           |
|                                                |                      | NE (NE, NE)    | 86 (57, NE)              | 57 (30, 86)              | 113 (66, NE)            |
|                                                |                      |                | $p < 0.0001$             | $p < 0.0001$             |                         |
|                                                | <b>Upper limbs</b>   | <b>N = 5</b>   | <b>N = 25</b>            | <b>N = 33</b>            | <b>N = 25</b>           |
|                                                |                      | 117 (117, NE)  | 85 (57, NE)              | 86 (57, 113)             | 113 (85, NE)            |
|                                                |                      |                | $p = 0.0008$             | $p < 0.0001$             |                         |
|                                                |                      | <b>N = 3</b>   | <b>N = 32</b>            | <b>N = 41</b>            | <b>N = 25</b>           |

|  |                    |             |              |              |              |
|--|--------------------|-------------|--------------|--------------|--------------|
|  | <b>Lower limbs</b> | NE (NE, NE) | 59 (30, 113) | 33 (29, 60)  | 111 (60, NE) |
|  |                    |             | $p < 0.0001$ | $p < 0.0001$ |              |

*CI* Confidence interval, *EASI* Eczema Area and Severity Index, *EASI-90*  $\geq 90\%$  improvement in EASI from baseline, *NE* not evaluable as too few events were observed; *Q2W* every 2 weeks, *QD* once daily

*P* values are for abrocitinib vs placebo

*N* represents the number of EASI-90 responders in each analysis



**Table S6** Kaplan-Meier median time to EASI-75 and EASI-90 for head and neck score among individuals with high baseline EASI head and neck score

|                                                | <b>Placebo</b> | <b>Abrocitinib<br/>100 mg QD</b> | <b>Abrocitinib<br/>200 mg QD</b> | <b>Dupilumab<br/>300 mg Q2W</b> |
|------------------------------------------------|----------------|----------------------------------|----------------------------------|---------------------------------|
| <b>Median time to EASI-75 in days (95% CI)</b> |                |                                  |                                  |                                 |
| Head and neck                                  | <b>N = 19</b>  | <b>N = 42</b>                    | <b>N = 57</b>                    | <b>N = 47</b>                   |
|                                                | 113 (58, 117)  | 57 (29, 85)                      | 29 (28, 45)                      | 57 (29, 85)                     |
|                                                |                | <i>p</i> = 0.0497                | <i>p</i> < 0.0001                |                                 |
| <b>Median time to EASI-90 in days (95% CI)</b> |                |                                  |                                  |                                 |
| Head and neck                                  | <b>N = 11</b>  | <b>N = 30</b>                    | <b>N = 42</b>                    | <b>N = 36</b>                   |
|                                                | NE (113, NE)   | 119 (65, NE)                     | 57 (32, 109)                     | 113 (85, 115)                   |
|                                                |                | <i>p</i> = 0.0591                | <i>p</i> = 0.0005                |                                 |

*CI* Confidence interval, *EASI* Eczema Area and Severity Index, *EASI-75* ≥75% improvement in EASI from baseline, *EASI-90* ≥90% improvement in EASI from baseline; *NE* not evaluable as too few events were observed, *Q2W* every 2 weeks, *QD* once daily

A high head and neck EASI score was defined as ≥4

*P* values are for abrocitinib vs placebo

*N* represents the number of EASI responders in each analysis

**Fig. S1.** Kaplan-Meier curve of time to first achieve  $\geq 90\%$  improvement from baseline in EASI body region score

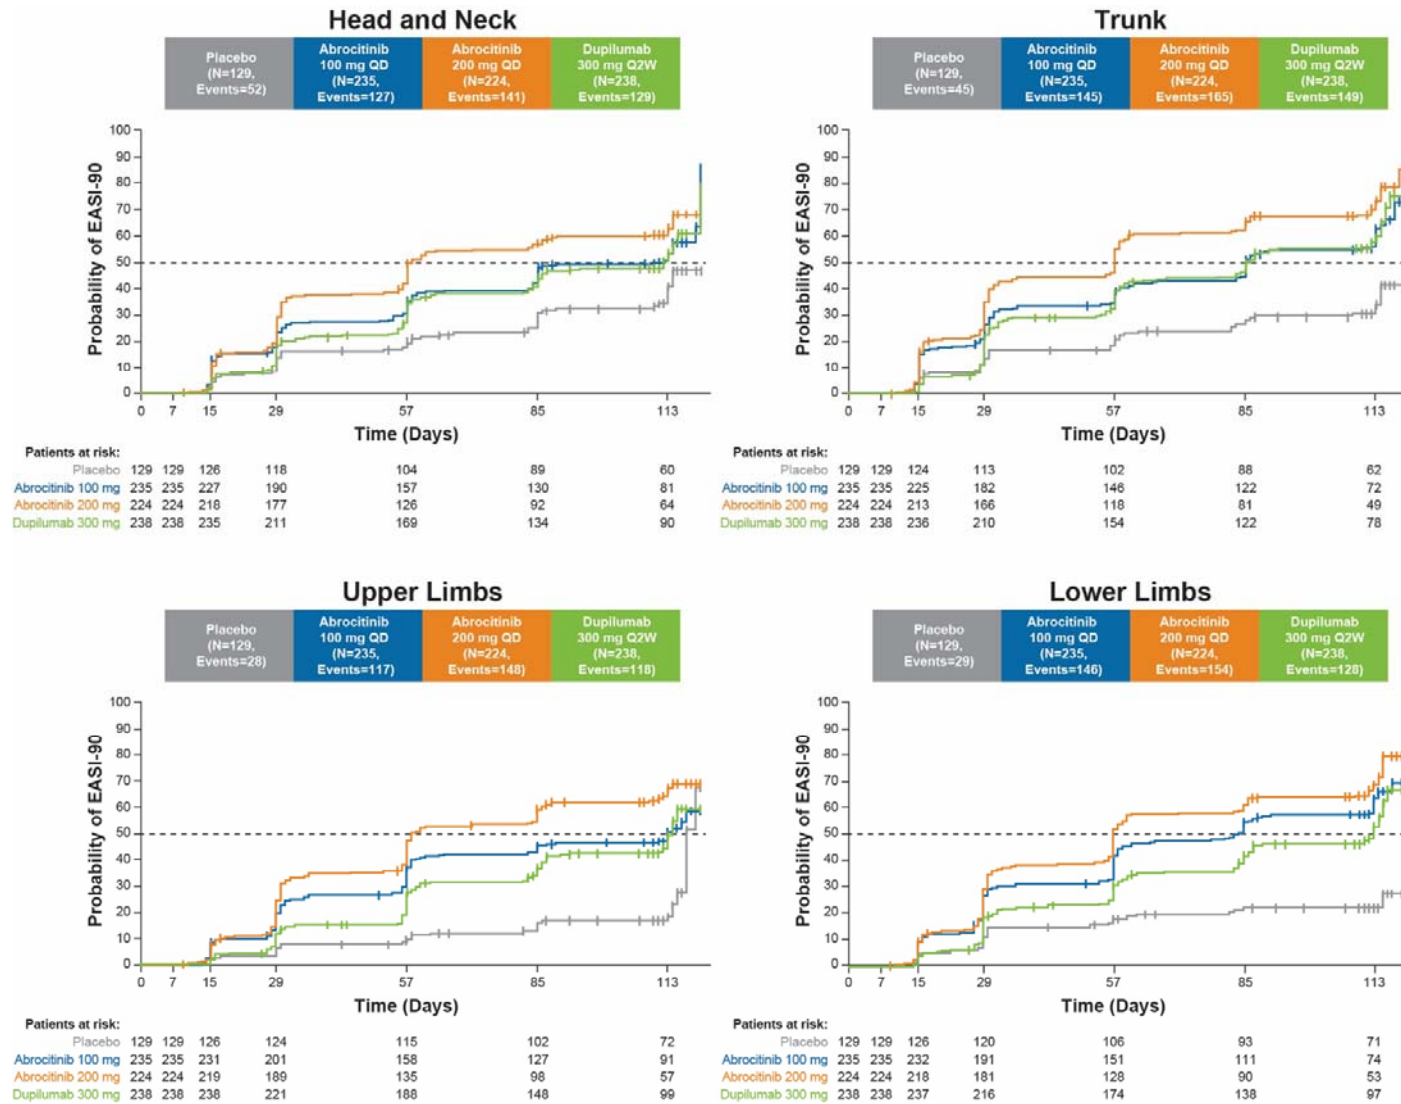

CI confidence interval, EASI Eczema Area and Severity Index, Q2W every 2 weeks, QD once daily

**Fig. S2.** Least squares mean percentage change from baseline in SCORAD (a) extent and (b) intensity at week 2.

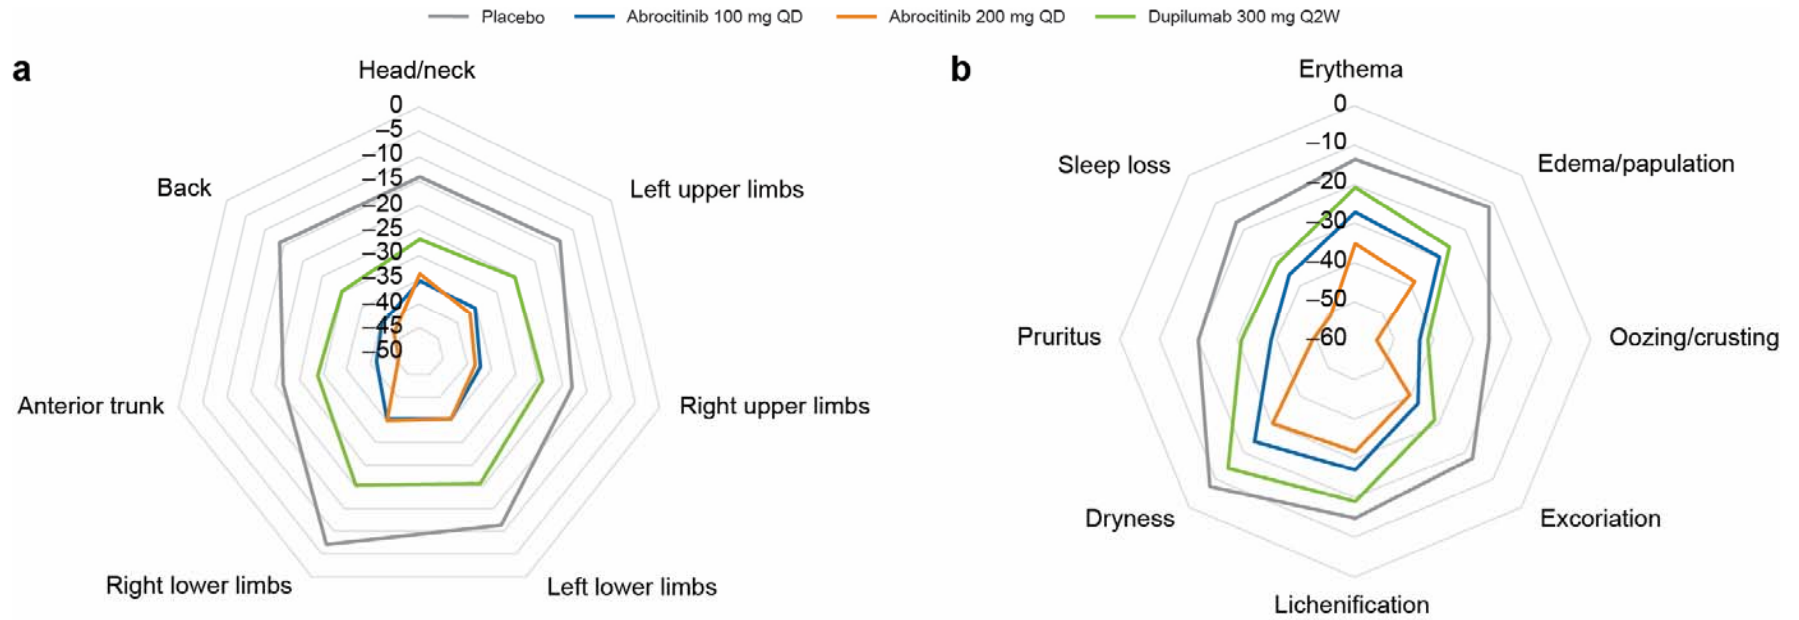

Q2W every 2 weeks, QD once daily, SCORAD SCORing Atopic Dermatitis
