# Supplementary material for: Rapidity of Improvement in Signs/Symptoms of Moderate-to-Severe Atopic Dermatitis by Body Region with Abrocitinib in the Phase 3 JADE COMPARE Study
Source: PubMed Central journal article supplement — Dermatol Ther (Heidelb). 2022 Mar 17;12(3):771–85. doi: 10.1007/s13555-022-00694-1 (PMC8940992; doi:10.1007/s13555-022-00694-1), 2022-03-17
Supplement: 13555_2022_694_MOESM2_ESM.pdf [file 13555_2022_694_MOESM2_ESM.pdf]

# Rapidity of Improvement in Signs/Symptoms of Moderate-to-Severe Atopic Dermatitis by Body Region with Abrocitinib in the Phase 3 JADE COMPARE Study

Andrew Alexis, Marjolein de Bruin-Weller, Stephan Weidinger, Weily Soong, Sebastien Barbarot, Ileana Ionita, Fan Zhang, Hernan Valdez, Claire Clibborn, Natalie Yin

## Changes in EASI in Different Body Regions

EASI Regional Score  
(least squares mean  
% change from baseline)

Median Time to  
EASI-75, days

Week 2

Week 16

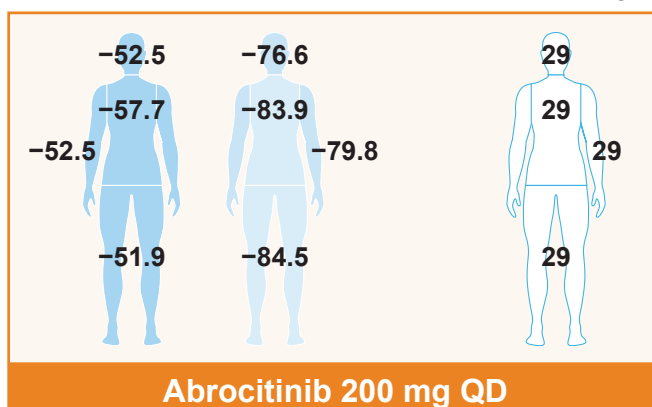

Abrocitinib 200 mg QD

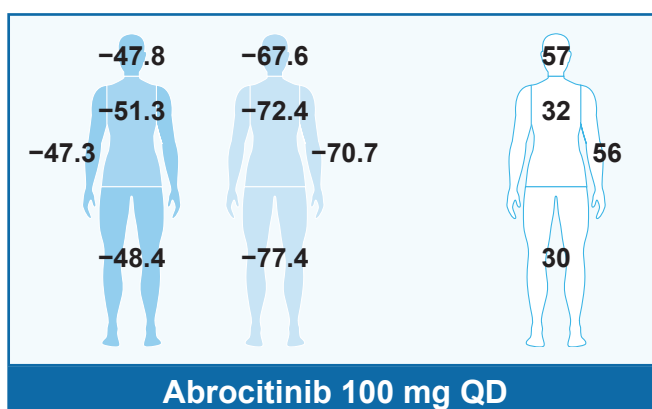

Abrocitinib 100 mg QD

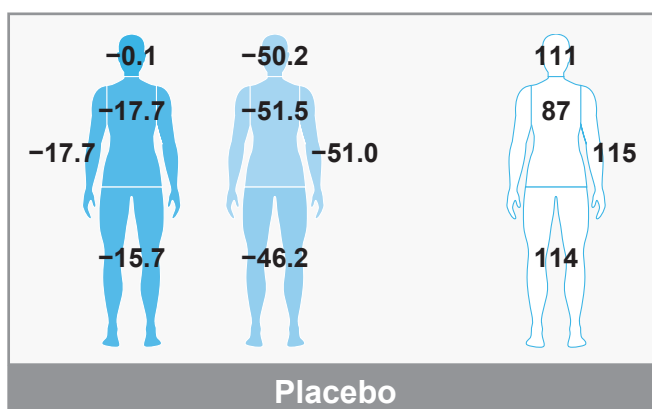

Placebo

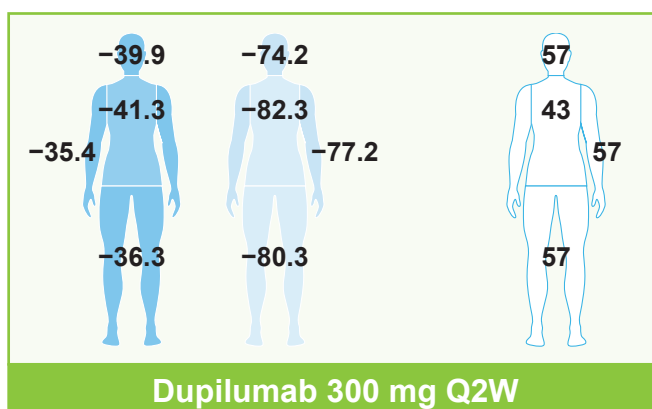

Dupilumab 300 mg Q2W

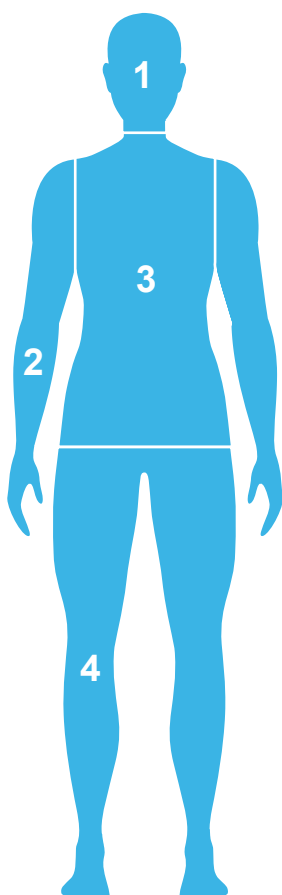

1

Head and neck

2

Upper limbs

3

Trunk

4

Lower limbs
